# Supplementary material for: Disparities in Hepatocellular Carcinoma Incidence, Stage, and Survival: A Large Population-Based Study
Source: Oxford University Press journal article supplement (doi:10.1158/1055-9965.epi-20-1088), 2021-03-18
Supplement: 10559965epi201088-sup-247526_3_supp_6915757_qppcpy.docx [file 10559965epi201088-sup-247526_3_supp_6915757_qppcpy.docx]

**Supplementary Table 1. Stage at diagnosis for male hepatocellular carcinoma cases by race/ethnicity and socioeconomic status (SES). % (CIs)**

|  |  | | | | |  | |
| --- | --- | --- | --- | --- | --- | --- | --- |
|  | **Local**  **n= 16,254** | **Regional**  **n= 9,449** | **Distant**  **n= 6,297** | **Unstaged**  **n= 2,893** | **P-value*** | |
| **AI/AN** |  |  |  |  |  | |
| Low SES | 51.0 (42.9, 59.2) | 24.1 (17.2, 31.1) | 16.6 (10.5, 22.6) | 8.3 (3.8, 12.8) | 0.002 | |
| Medium SES | 38.5 (29.4, 47.7) | 33.0 (24.2, 41.9) | 22.9 (15.0, 30.8) | 5.5 (1.2, 9.8) |  | |
| High SES | 31.1 (17.6, 44.6) | 53.3 (38.8, 67.9) | 6.7 (0, 14.0) | 8.9 (0.6, 17.2) |  | |
| **Asian/PI** |  |  |  |  |  | |
| Low SES | 43.0 (40.4, 45.6) | 29.6 (27.2, 32.0) | 19.4 (17.3, 21.5) | 7.9 (6.5, 9.4) | <0.001 | |
| Medium SES | 47.0 (44.8, 49.2) | 29.3 (27.4, 31.3) | 17.8 (16.1, 19.4) | 5.9 (4.9, 6.9) |  | |
| High SES | 54.0 (52.0, 55.9) | 25.7 (24.0, 27.4) | 13.7 (12.4, 15.1) | 6.6 (5.6, 7.6) |  | |
| **Black** |  |  |  |  |  | |
| Low SES | 42.8 (40.9, 44.8) | 28.1 (26.4, 29.8) | 21.2 (19.6, 22.8) | 7.9 (6.8, 8.9) | 0.164 | |
| Medium SES | 41.5 (38.6, 44.4) | 27.7 (25.1, 30.4) | 22.7 (20.2, 25.1) | 8.1 (6.5, 9.7) |  | |
| High SES | 44.1 (39.9, 48.3) | 28.9 (25.1, 32.7) | 17.4 (14.2, 20.6) | 9.6 (7.1, 12.1) |  | |
| **Latino** |  |  |  |  |  | |
| Low SES | 46.4 (44.6, 48.2) | 26.0 (24.4, 27.6) | 18.6 (17.2, 20.0) | 9.0 (8.0, 10.0) | 0.340 | |
| Medium SES | 48.9 (46.7, 51.1) | 27.1 (25.1, 29.0) | 16.3 (14.6, 17.9) | 7.8 (6.6, 9.0) |  | |
| High SES | 49.1 (46.1, 52.1) | 26.0 (23.4, 28.6) | 16.7 (14.5, 18.9) | 8.2 (6.6, 9.8) |  | |
| **White** |  |  |  |  |  | |
| Low SES | 45.6 (44.2, 47.0) | 26.3 (25.0, 27.5) | 19.4 (18.3, 20.5) | 8.8 (8.0, 9.5) | <0.001 | |
| Medium SES | 46.0 (44.8, 47.2) | 27.1 (26.0, 28.1) | 18.7 (17.8, 19.6) | 8.3 (7.6, 8.9) |  | |
| High SES | 47.4 (46.2, 48.6) | 26.8 (25.7, 27.8) | 16.4 (15.5, 17.3) | 9.4 (8.7, 10.1) |  | |

*P-value was obtained by comparing cancer stage distribution between low-SES and high-SES group by race/ethnicity.
