# Supplementary material for: Disparities in Hepatocellular Carcinoma Incidence, Stage, and Survival: A Large Population-Based Study
Source: Oxford University Press journal article supplement (doi:10.1158/1055-9965.epi-20-1088), 2021-03-18
Supplement: 10559965epi201088-sup-247526_3_supp_6915758_q66c6y.docx [file 10559965epi201088-sup-247526_3_supp_6915758_q66c6y.docx]

**Supplementary Table 2. Stage at diagnosis for female hepatocellular carcinoma cases by race/ethnicity and socioeconomic status (SES). % (CIs)**

|  | **Local**  **n= 5,662** | **Regional**  **n= 2,613** | **Distant**  **n= 1,661** | | **Unstaged**  **n= 960** | | **P-value*** | |
| --- | --- | --- | --- | --- | --- | --- | --- | --- |
| **AI/AN** |  |  | |  | |  | |  | |
| Low SES | 41.8 (30.0, 53.6) | 26.9 (16.3, 37.5) | | 20.9 (11.2, 30.6) | | 10.4 (3.1, 17.8) | | 0.062 | |
| Medium SES | 54.3 (40.0, 68.7) | 17.4 (6.4, 28.3) | | 19.6 (8.1, 31.0) | | 8.7 (0.6, 16.8) | |  | |
| High SES | 36.8 (15.2, 58.5) | 47.4 (24.9, 69.8) | | 0 | | 15.8 (0, 32.2) | |  | |
| **Asian/PI** |  |  | |  | |  | |  | |
| Low SES | 53.8 (49.4, 58.2) | 23.4 (19.6, 27.2) | | 15.4 (12.2, 18.6) | | 7.4 (5.1, 9.7) | | 0.104 | |
| Medium SES | 55.4 (51.8, 59.1) | 21.9 (18.9, 25.0) | | 13.8 (11.3, 16.4) | | 8.8 (6.7, 10.9) | |  | |
| High SES | 58.6 (55.4, 61.9) | 22.1 (19.4, 24.8) | | 11.2 (9.1, 13.3) | | 8.1 (6.3, 9.9) | |  | |
| **Black** |  |  | |  | |  | |  | |
| Low SES | 46.1 (42.7, 49.5) | 27.1 (24.1, 30.1) | | 17.3 (14.8, 19.9) | | 9.4 (7.5, 11.4) | | 0.210 | |
| Medium SES | 49.5 (43.9, 55.1) | 26.1 (21.1, 31.0) | | 13.9 (10.0, 17.8) | | 10.6 (7.1, 14.0) | |  | |
| High SES | 53.8 (45.7, 61.9) | 20.0 (13.5, 26.5) | | 18.6 (12.3, 25.0) | | 7.6 (3.3, 11.9) | |  | |
| **Latino** |  |  | |  | |  | |  | |
| Low SES | 52.5 (49.4, 55.6) | 23.3 (20.7, 25.9) | | 15.4 (13.2, 17.6) | | 8.8 (7.0, 10.5) | | 0.298 | |
| Medium SES | 56.2 (52.5, 60.0) | 22.2 (19.1, 25.3) | | 13.4 (10.8, 15.9) | | 8.2 (6.2, 10.3) | |  | |
| High SES | 53.6 (48.3, 58.8) | 26.8 (22.1, 31.4) | | 12.5 (9.1, 16.0) | | 7.1 (4.4, 9.8) | |  | |
| **White** |  |  | |  | |  | |  | |
| Low SES | 50.7 (48.1, 53.2) | 23.8 (21.6, 25.9) | | 16.1 (14.2, 17.9) | | 9.5 (8.0, 11) | | 0.797 | |
| Medium SES | 51.5 (49.3, 53.7) | 24.0 (22.1, 25.9) | | 15.7 (14.0, 17.3) | | 8.8 (7.5, 10.1) | |  | |
| High SES | 49.7 (47.4, 51.9) | 24.8 (22.9, 26.8) | | 16.6 (14.9, 18.2) | | 8.9 (7.6, 10.2) | |  | |

*P-value was obtained by comparing cancer stage distribution between low-SES and high-SES group by race/ethnicity.
