# Supplementary material for: Disparities in Hepatocellular Carcinoma Incidence, Stage, and Survival: A Large Population-Based Study
Source: Oxford University Press journal article supplement (doi:10.1158/1055-9965.epi-20-1088), 2021-03-18
Supplement: 10559965epi201088-sup-247526_3_supp_6915759_qrrcry.docx [file 10559965epi201088-sup-247526_3_supp_6915759_qrrcry.docx]

|  |  | **Adjusted Hazard Ratioa** | **95% CI** | | **P-value** |
| --- | --- | --- | --- | --- | --- |
| **Year of diagnosis** |  | 0.967 | 0.964 | 0.969 | <.0001 |
| **Age at diagnosis** |  | 1.011 | 1.01 | 1.012 | <.0001 |
| **Sex** | Female vs. Male | 0.952 | 0.926 | 0.978 | 0.0004 |
| **Surgery** | Yes vs. No | 0.305 | 0.296 | 0.315 | <.0001 |
| **SES** | Medium vs. Low | 0.905 | 0.881 | 0.93 | <.0001 |
|  | High vs. Low | 0.823 | 0.799 | 0.848 | <.0001 |
| **Race/ethnicity** | Latinos vs. Whites | 0.947 | 0.918 | 0.978 | 0.0008 |
|  | AI/ANs vs. Whites | 1.004 | 0.896 | 1.126 | 0.9405 |
|  | APIs vs. Whites | 0.853 | 0.826 | 0.881 | <.0001 |
|  | Blacks vs. Whites | 1.063 | 1.024 | 1.103 | 0.0012 |
| **Stage** | Distant vs. Localized | 2.431 | 2.353 | 2.512 | <.0001 |
|  | Regional vs. Localized | 1.579 | 1.535 | 1.625 | <.0001 |
|  | Unstaged vs. Localized | 1.438 | 1.377 | 1.5 | <.0001 |
| a Adjusted by age, sex, year of diagnosis, race/ethnicity, stage, and surgery of primary site. | | | | | |

**Supplementary Table 3. Relationship between race/ethnicity, socioeconomic status (SES), other covariates, and 5-year survival among hepatocellular carcinoma cases.**
